# Supplementary material for: Ruminative Tendency Relates to Ventral Striatum Functionality: Evidence From Task and Resting-State fMRI
Source: PubMed Central journal article supplement (PMC7044182; doi:10.3389/fpsyt.2020.00067), 2020-02-20
Supplement: DataSheet_1.pdf [file DataSheet_1.pdf]

## Supplementary Material

### Additional Information About MDD Patients

| Patient Number | Gender | Age | CGI-Severity     | HDRS-21      | List of medications                                                       | Currently on medication | Number of past hospitalizations |
|----------------|--------|-----|------------------|--------------|---------------------------------------------------------------------------|-------------------------|---------------------------------|
| 1              | F      | 29  | 6=severely ill   | 24           | Fluoxetine 40mg                                                           | Yes                     | 0                               |
| 2              | F      | 58  | 5=markedly ill   | 29           | Bupropion 150mg, Fluoxetine 40mg                                          | Yes                     | 0                               |
| 3              | M      | 42  | 5=markedly ill   | 27           | Nortriptyline 150mg, Bupropion 150mg                                      | Yes                     | 2                               |
| 4              | M      | 41  | 4=moderately ill | 25           | Mianserin 60mg                                                            | Yes                     | 0                               |
| 5              | M      | 33  | 4=moderately ill | 25           | Escitalopram 20mg, Lorazepam 1mg                                          | Yes                     | 0                               |
| 6              | M      | 60  | 4=moderately ill | 25           | Amitriptyline 150mg, Lorazepam 2mg, Mirtazapine 30mg                      | Yes                     | 0                               |
| 7              | F      | 49  | 6=severely ill   | 25           | Aripiprazole 10mg, Clonazepam 1mg                                         | Yes                     | 0                               |
| 8              | M      | 47  | 5=markedly ill   | 25           | Escitalopram 40mg, Clonazepam 1.5mg, Olanzapine 20mg, Amitriptyline 200mg | Yes                     | 0                               |
| 9              | F      | 56  | 5=markedly ill   | 25           | Milnacipran 50mg                                                          | Yes                     | 0                               |
| 10             | M      | 24  | 4=moderately ill | 25           | Licarbium 1350mg                                                          | Yes                     | 0                               |
| 11             | F      | 39  | 5=markedly ill   | 25           | Quetiapine 100mg, Clonazepam 0.5mg, Fluoxetine 50 mg, Topiramate 25mg     | Yes                     | 1                               |
| 12             | M      | 35  | 3=mildly ill     | 25           | Escitalopram 20mg                                                         | Yes                     | 0                               |
| 13             | M      | 34  | 4=moderately ill | 26           | Venlafaxine 150mg, Perphenazine 4mg                                       | Yes                     | 0                               |
| 14             | M      | 42  | 4=moderately ill | 25           | Vortioxetine 20mg, Aripiprazole 5mg                                       | Yes                     | 1                               |
| 15             | M      | 31  | 6=severely ill   | 25           | Clomipramine 300mg, Escitalopram 20mg, Duloxetine 30mg                    | No                      | 0                               |
| 16             | M      | 29  | 4=moderately ill | 25           | Sertraline 100mg, Vortioxetine 10mg                                       | Yes                     | 0                               |
| 17             | M      | 27  | 4=moderately ill | 25           | Vortioxetine 20mg, lamotrigine 400mg                                      | Yes                     | 1                               |
| 18             | M      | 54  | 5=markedly ill   | 27           | Fluvoxamine 150mg, Aripiprazole 5 mg                                      | Yes                     | 0                               |
| 19             | F      | 28  | 4=moderately ill | not reported | Venlafaxine 150mg, Clonazepam 1mg                                         | No                      | 0                               |
| 20             | M      | 43  | 4=moderately ill | not reported | Vortioxetine 20mg, Quetiapine 100mg                                       | Yes                     | 0                               |
| 21             | F      | 30  | 4=moderately ill | 31           | Venlafaxine 150mg                                                         | Yes                     | 0                               |
| 22             | F      | 53  | 4=moderately ill | 32           | Venlafaxine 150mg, Clonazepam 1mg                                         | Yes                     | 0                               |
| 23             | M      | 38  | 4=moderately ill | 25           | None                                                                      | No                      | 0                               |

Table S1. Demographic, clinical and drug information about MDD patients. The clinical assessments included the clinical global impression (CGI) scale (Bunser and Targum, 2007; Guy, 1976), and Hamilton Depression Rating Scale (HDRS; Hamilton, 1960).

*Note:* MDD=major depressive disorder

**Reward>Punishment**

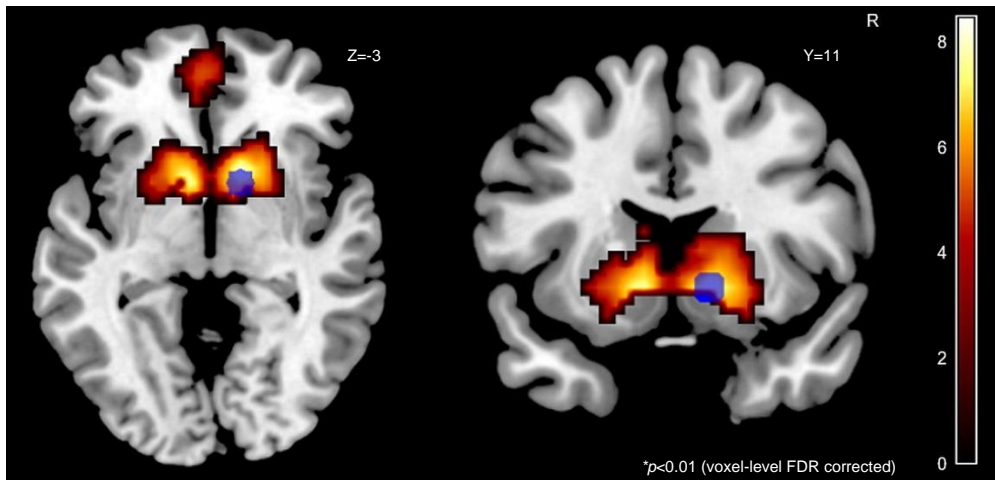

Figure S1. Whole brain analysis fMRI results of the gambling task (n=70) overlap with right NAcc anatomical mask (blue). Reward>Punishment contrast revealed bilateral VS activity. Results displayed at a significance threshold of  $p<0.01$  (voxel-level FDR corrected) and a minimum cluster size=50 for visualization purposes. Color bar reflects t scores. Only positive effects survived whole brain corrections.

*Note:* NAcc=nucleus accumbens; VS=ventral striatum.

**VS/NAcc-OFC rsFC**

| Brain Region                  | MNI Coordinates |    |    | Size $p$ -<br>Unc. | Peak $p$ -<br>Unc. | Voxels |
|-------------------------------|-----------------|----|----|--------------------|--------------------|--------|
| <i>Increased connectivity</i> | X               | Y  | Z  |                    |                    |        |
| Left OFC                      | -24             | 62 | -2 | <0.001             | <0.001             | 497    |

Table S2. Left OFC showing increased functional connectivity with NAcc during RS as a factor of rumination levels. Results are based on a threshold  $p<0.005$  (unc.) for individual voxel and  $p<0.05$  (corrected) for cluster extent.

*Note:* VS=ventral striatum; NAcc=nucleus accumbens; rsFC=resting-state functional connectivity; RS=resting-state; OFC=orbitofrontal cortex.

### RRS Scores: Split by Group

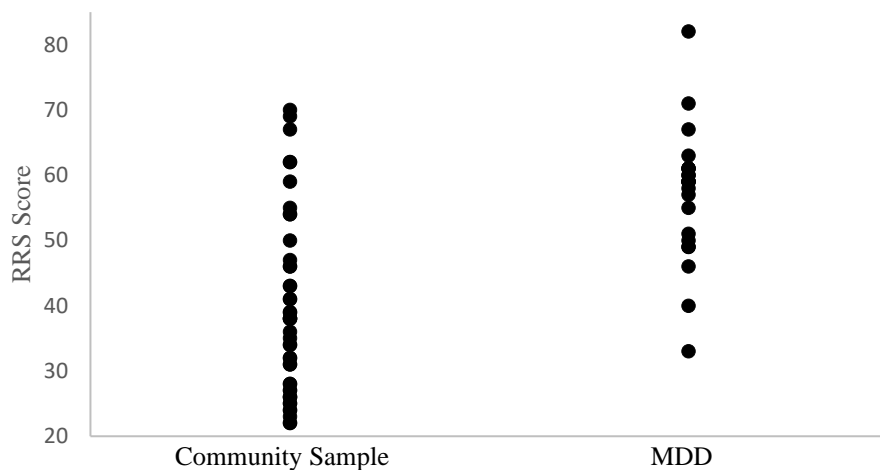

Figure S2. RRS score distribution in the community sample and the MDD groups.

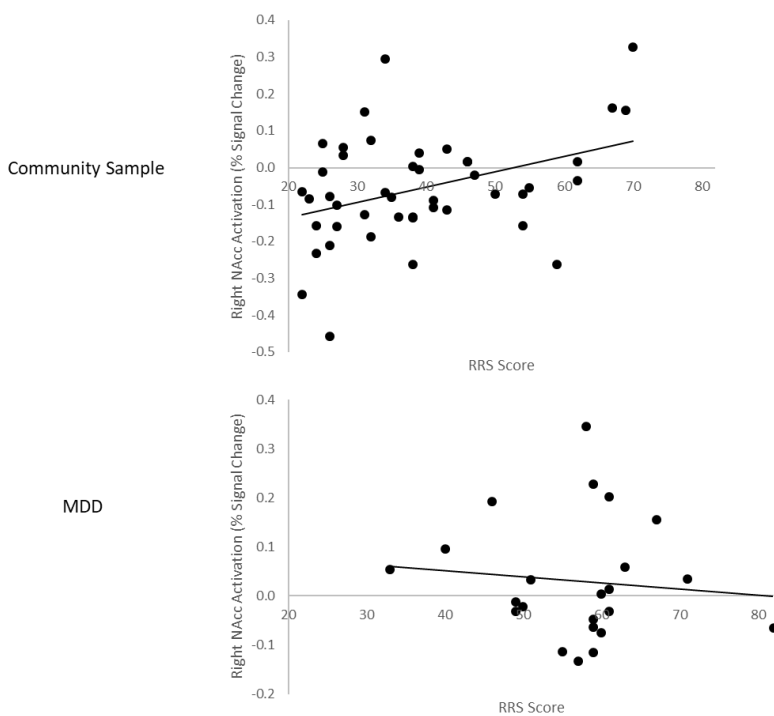

Figure S3. VS/NAcc activity as a function of RRS scores: split by group. Positive correlation between VS/NAcc activation during reward processing and RRS scores was found in the community sample group ( $n=45$ ). This correlation remains significant while controlling for BDI scores and scanner type ( $r(36)=0.41, p=0.01$ ). Correlation when only the MDD group was considered didn't yield significant results.

*Note:* VS=ventral striatum; NAcc=nucleus accumbens; RRS=Ruminative Response Scale; BDI=Beck Depression Inventory; MDD=Major Depressive Disorder.

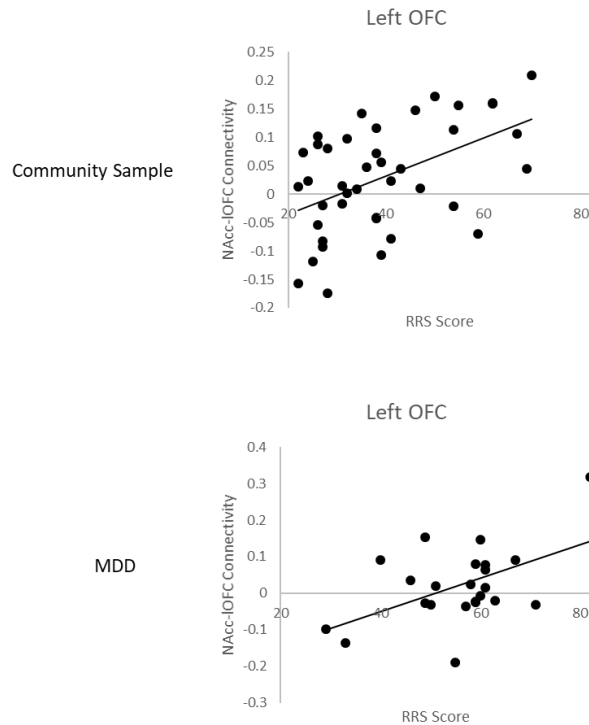

Figure S4. Resting-state Z connectivity values as a function of RRS scores: split by group. Left OFC connectivity with the right NAcc is positively correlated with ruminative tendency in both groups (while controlling for BDI levels and scanner type). Community sample:  $r(39)=0.49$ ,  $p=0.001$ ; MDD:  $r(21)=0.51$ ,  $p=0.013$ .

*Note:* NAcc=nucleus accumbens; OFC=orbitofrontal cortex; BDI=Beck Depression Inventory; RRS=Ruminative Response Scale.

**Figures S3 and S4-note:**

In exploratory post-hoc analyses, we also examined the associations between RRS scores and VS/NAcc activation and connectivity separately within the community sample and the MDD sample (see Figures S3 and S4 above). For activation data, similarly to the analysis on the full sample, a significant correlation emerged in the community sample group,  $r(36)=0.41$ ,  $p=0.01$ ; however, no significant correlation was observed in the MDD sample,  $r(20)=-0.01$ ,  $p=0.96$ . For connectivity data, a significant correlation emerged both in the community sample group and the MDD group (community sample:  $r(39)=0.49$ ,  $p=0.001$ ; MDD:  $r(21)=0.51$ ,  $p=0.013$ ).

## References

Busner J and Targum SD., (2007). The clinical global impressions scale: applying a research tool in clinical practice. *Psychiatry (Edgmont)* 4, 28–37.

Guy W., (1976). *ECDEU Assessment Manual for Psychopharmacology*. Rockville, MD: US Department of Health, Education, and Welfare Public Health Service Alcohol, Drug Abuse, and Mental Health Administration.

Hamilton M., (1960). A rating scale for depression. *Journal of Neurology, Neurosurgery and Psychiatry* 23, 56–61.
